# Supplementary material for: Relating polar bears killed, human presence, and ice conditions in Svalbard 1987–2019
Source: Frontiers journal article supplement (doi:10.3389/fcosc.2023.1187527), 2023-07-28
Supplement: Data_Sheet_1.PDF [file Data_Sheet_1.PDF]

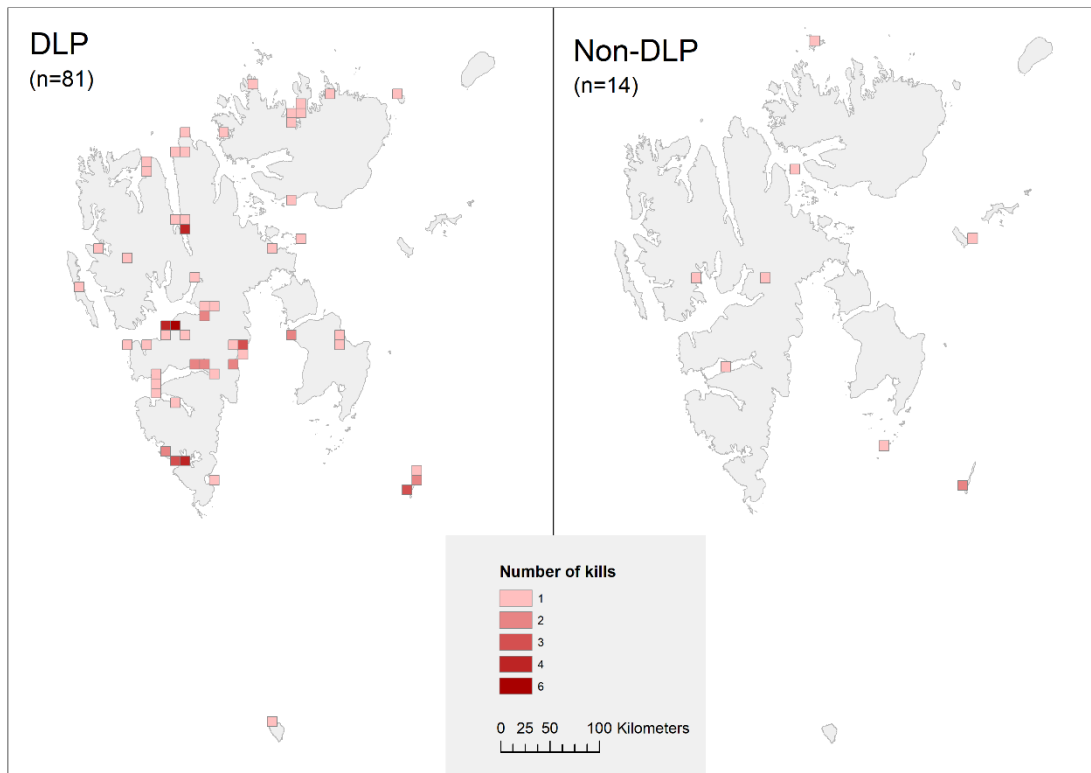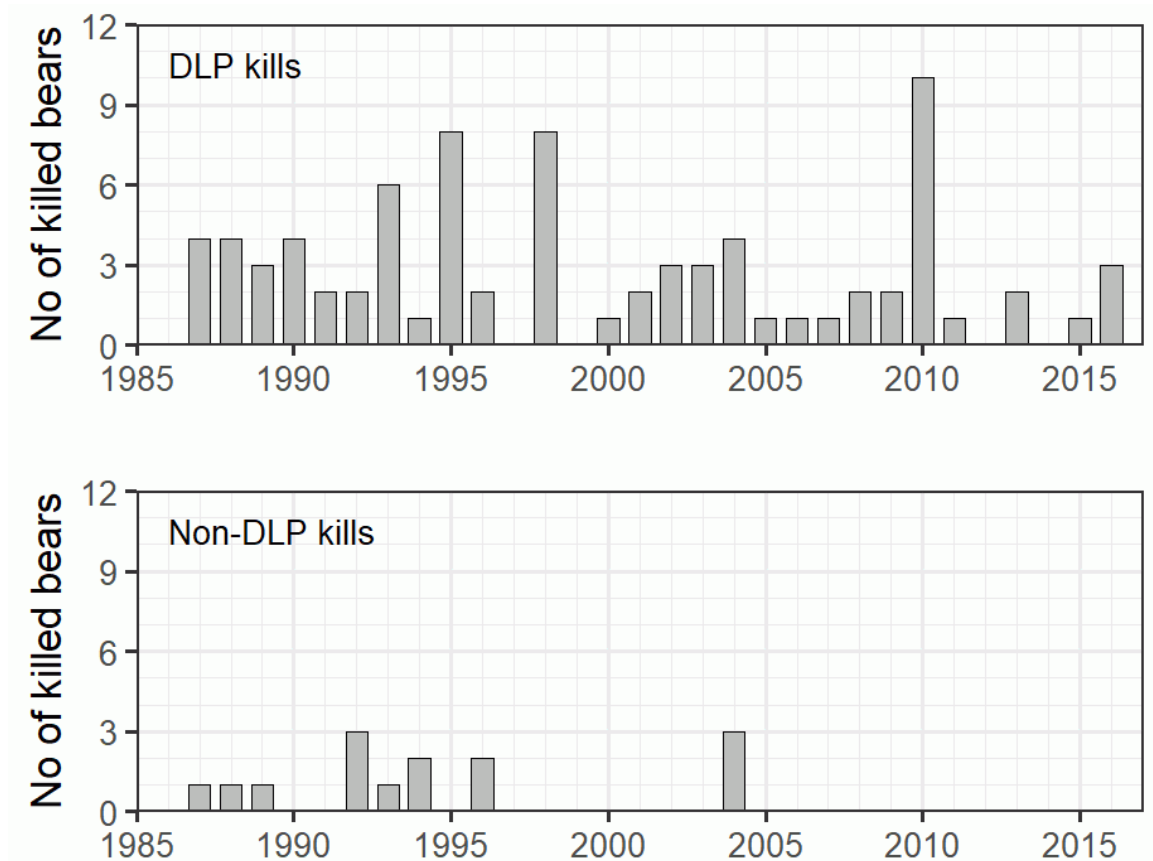

Figure S1 Kills of polar bears in Svalbard 1987-2016. Maps show locations aggregated over a 10 km<sup>2</sup> grid, and bar graphs show year of DLP and non-DLP kills.
