# Supplementary material for: Relating polar bears killed, human presence, and ice conditions in Svalbard 1987–2019
Source: Frontiers journal article supplement (doi:10.3389/fcosc.2023.1187527), 2023-07-28
Supplement: Data_Sheet_2.PDF [file Data_Sheet_2.PDF]

Table S2 Existing data on tourism traffic at Svalbard in the period after 1995.

| Type of data                                                            | Coverage       | Resolution        | Source                      |
|-------------------------------------------------------------------------|----------------|-------------------|-----------------------------|
| People arriving in Longyearbyen                                         | 1995 – present | Monthly           | Visit Svalbard <sup>1</sup> |
| Guest nights in Longyearbyen                                            | 1995 – present | Monthly           | Visit Svalbard              |
| Number of people disembarking from cruise ships                         | 1996 – present | Yearly            | MOSJ <sup>2</sup>           |
| Number of coastal landing sites for tourists                            | 1996 – present | Yearly            | MOSJ                        |
| Number of people visiting areas outside management area 10 <sup>3</sup> | 1998 – present | Yearly            | MOSJ                        |
| Planned travel outside management area 10                               | 1996 – 2017    | All planned trips | Governor of Svalbard        |

<sup>1</sup> Main tourist operator in Longyearbyen, Svalbard

<sup>2</sup> Monitoring system for Svalbard and Jan Mayen (<http://mosj.no/en/>)

<sup>3</sup> Svalbard was until 2018 divided in 10 areas used to facilitate management actions
