# Supplementary material for: Relating polar bears killed, human presence, and ice conditions in Svalbard 1987–2019
Source: Frontiers journal article supplement (doi:10.3389/fcosc.2023.1187527), 2023-07-28
Supplement: Data_Sheet_3.PDF [file Data_Sheet_3.PDF]

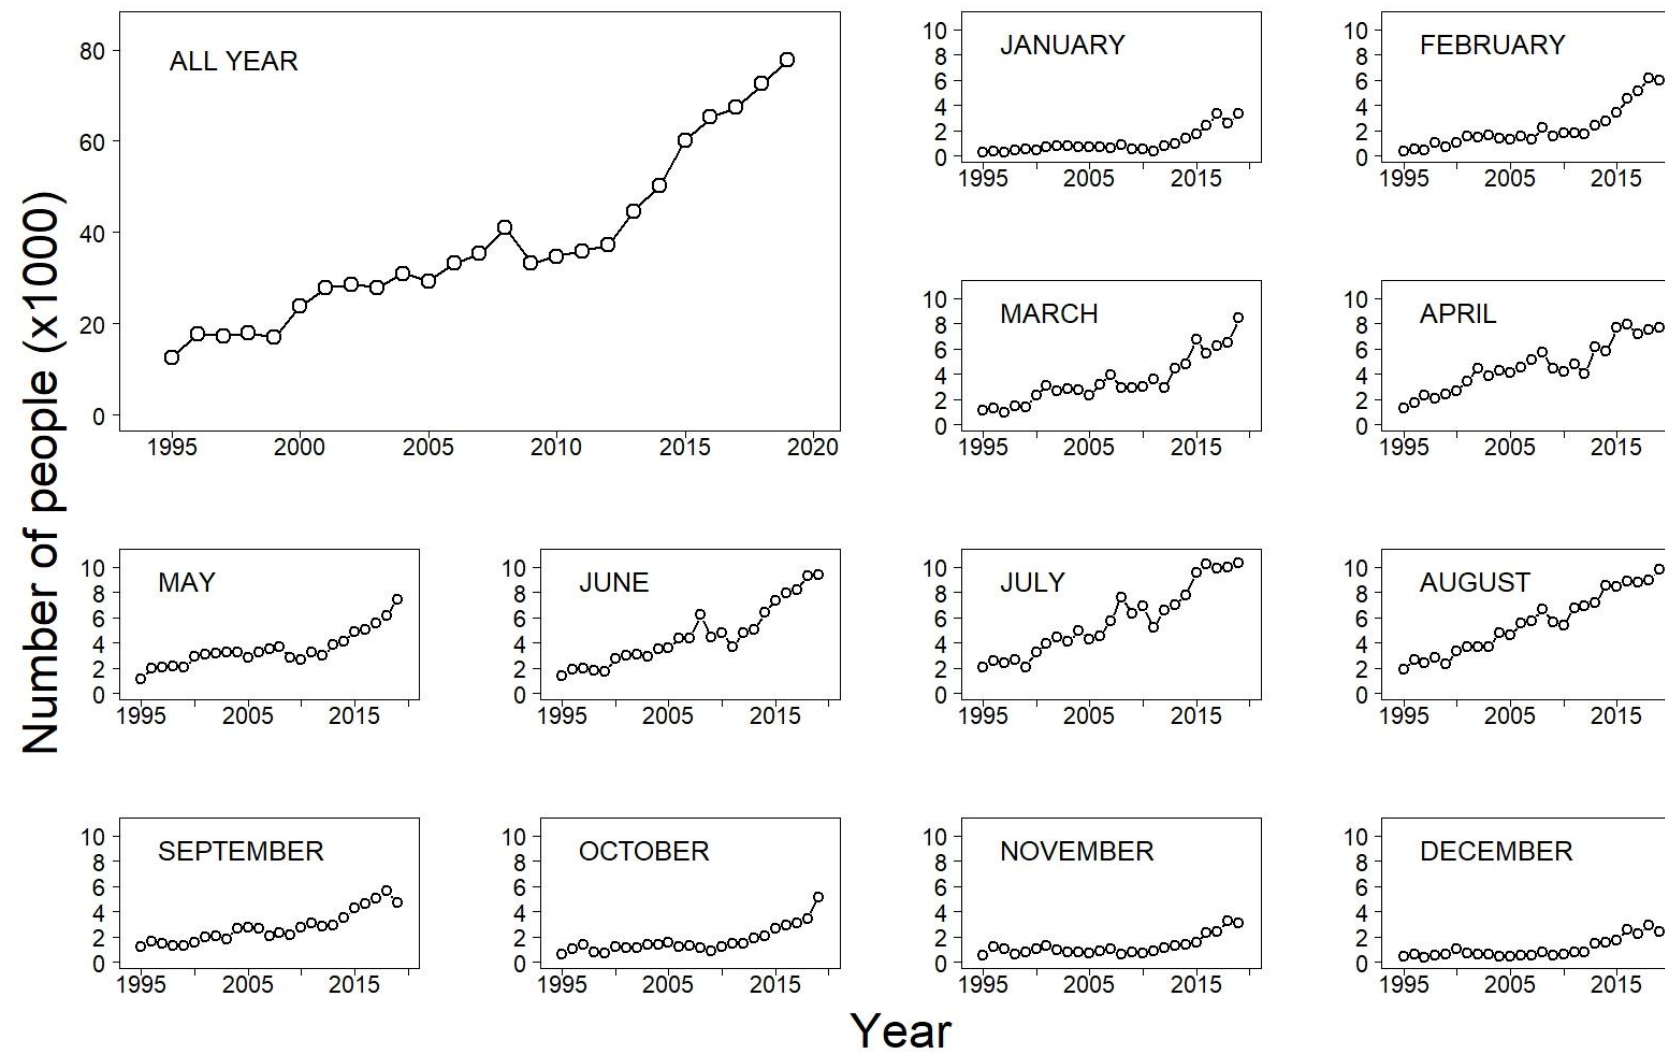

Figure S3 Number of people arriving in Longyearbyen per year (large panel) and each month (smaller panels) since 1995 (data from Visit Svalbard - <https://www.visitsvalbard.com>).
